# Supplementary material
Source: publisher figshare collection journal article supplement (https://brill.figshare.com/ndownloader/files/30459360)
Supplement: Supplementary file 1 [file 30459360]

## Sheet: S2.1 Non-gekkotan results
Table A1. Comparisons between different activity times of non-gekkotan species, using pairwise t-test for two means.
Activity Time	Mean longevity ± 1 SE	t	df	n	P
Nocturnal (non-gekkotan lizards)	12.8±2.2	-6.47692	21.686/35.877	21	0.15/0.81
Diurnal (non-gekkotan lizards)	10.2±0.4	-1.4928	21.686	497	0.15
Cathemeral (non-gekkotan lizards)	11.7±1.4	0.23048	35.877	37	0.81
Nocturnal (skink species only)	15.9±3.8	1.8583	11.753/14.421	10	0.01/0.16
Diurnal (skink species only)	9.6±0.9	-2.6977	11.753	87	0.01
Cathemeral (skink species only)	9.5±1.0	-1.4517	14.421	21	0.16
Table A2. The model for the Scincidae family, testing the effect of all levels of activity times on longevity (PGLS).
Factor	Estimate	SE	t	P
Body Mass (log10 grams)	0.235	0.067	3.5	0.006
Activity Time (Diurnal)	0.44	0.157	2.7
Activity Time (Cathemeral)	0.491	0.176	2.7	0.58
Activity Time (Nocturnal)	0.57	0.204	2.7	0.31
Sample Size (log10)	0.025	0.035	0.7	0.47
* Estimates for body mass and sample size, are slopes. Estimates for the activity times are intercepts. P values are for differences from zero for mass and sample size, and for differences of diurnal and cathemeral species, in turn, from nocturnal species. R squared = 0.25, n = 81, λ = 0.600, p < 0.0001.

## Sheet: S2.2 - Size vs. Longevity
Table A3. Longevity as a function of body mass for Gekkota species vs. all other lizards’ clades, using well sampled data only (≥30 species, PGLS)
Group	R2	Slope ± 1 SE	t	Intercept ± 1 SE	n	λ	P	Confidence Interval of slope
Gekkota	0.4	0.377±0.102	3.6	0.732±0.085	17	0	0.001	0.084-670
Non-Gekkota	0.38	0.300±0.033	9	0.513±0.098	121	0.722	< 0.0001	0.240-0.372

## Sheet: S2.3 - Large sample analysis
Table A4. The model for all the lizards clades together (including the Gekkota), testing the effect of all levels of activity times on longevity, with well sampled data only (≥30 species, PGLS)
Factor	Estimate	SE	t	P
Body mass	0.299	0.033	8.9	< 0.0001
Activity time (Diurnal)	0.725	0.153	4.7
Activity time (Cathemeral)	0.708	0.174	4	0.86
Activity time (Nocturnal)	0.794	0.159	4.9	0.39
Sample size	-0.091	0.055	-1.6	0.1
λ =0.696, R2 = 0.40, n = 138, p < 0.0001
Table A5. The model for the Gekkota (infraorder), testing the effect of all levels of activity times on longevity with well sampled data only (≥30 species, PGLS)
Factor	Estimate	SE	t	P
Body mass	0.444	0.137	3.2	0.007
Activity time (Diurnal)	1.218	0.451	2.6
Activity time (Cathemeral)	1.289	0.382	3.3	0.76
Activity time (Nocturnal)	1.243	0.374	3.3	0.89
Sample size	-0.278	0.191	-1.4	0.17
λ =0.000, R2 = 0.51, n = 17, p < 0.0001
Table A6. The model for Gekkonidae family only, using well sampled data only (≥30 species, PGLS)
Factor	Estimate	SE	t	P
Body mass	0.449	0.119	3.7	0.16
Activity time (Diurnal)	0.707	0.42	1.6
Activity time (Nocturnal)	0.873	0.369	2.3	0.52
Sample size	-0.084	0.161	-0.5	0.69
λ =0.000, R2 = 0.95, n = 5, p = 0.28
Table A7. The model for Scincidae family only, using well sampled data only (≥30 species, PGLS)
Factor	Estimate	SE	t	P
Body mass	0.269	0.075	2.4	0.002
Activity time (Diurnal)	0.656	0.271	2.4
Activity time (Cathemeral)	0.611	0.343	1.7	0.82
Activity time (Nocturnal)	0.83	0.318	2.6	0.43
Sample size	-0.058	0.118	-0.5	0.62
λ =0.000, R2 = 0.49, n = 24, p =0.008
